# Supplementary material for: Comprehensive analyses of cuproptosis-related gene CDKN2A on prognosis and immunologic therapy in human tumors
Source: PubMed Central journal article supplement — Medicine (Baltimore). 2022 Apr 7;102(14):e33468. doi: 10.1097/MD.0000000000033468 (PMC10082276; doi:10.1097/md.0000000000033468), 2022-04-07
Supplement: medi-102-e33468-s004.pdf [file medi-102-e33468-s004.pdf]

Figure S4. Gene Set Enrichment Analysis. The roles of CDKN2A in KIRC (A), LIHC (B), UCEC (C) by performing Gene Set Enrichment Analysis (GSEA).

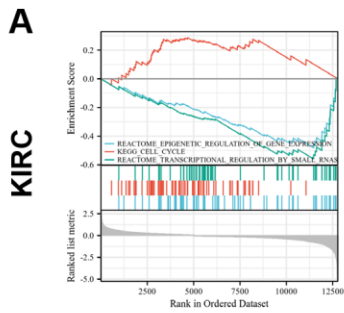

| ID                   | ES     | NES    | p.adjust | FDR   |
|----------------------|--------|--------|----------|-------|
| REACTOME_EPIGENET... | -0.482 | -1.656 | 0.067    | 0.056 |
| REACTOME_TRANSCRI... | -0.560 | -1.869 | 0.067    | 0.056 |
| KEGG_CELL_CYCLE      | 0.287  | 1.342  | 0.182    | 0.151 |

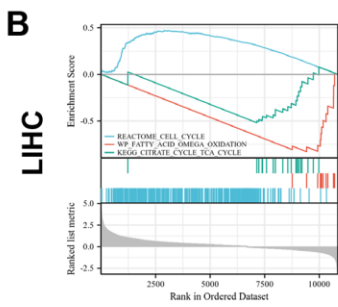

| ID                   | ES     | NES    | p.adjust | FDR   |
|----------------------|--------|--------|----------|-------|
| REACTOME_CELL_CYCLE  | 0.472  | 1.783  | 0.074    | 0.061 |
| WP_FATTY_ACID_OME... | -0.831 | -2.619 | 0.089    | 0.073 |
| KEGG_CITRATE_CYCL... | -0.519 | -1.968 | 0.089    | 0.074 |

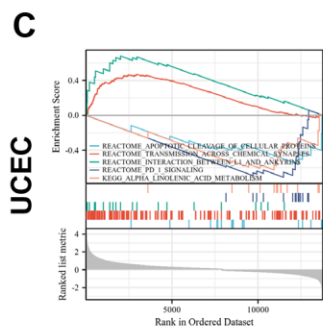

| ID                   | ES     | NES    | p.adjust | FDR   |
|----------------------|--------|--------|----------|-------|
| REACTOME_TRANSMIS... | 0.469  | 1.844  | 0.119    | 0.112 |
| REACTOME_INTERACT... | 0.679  | 1.964  | 0.119    | 0.112 |
| REACTOME_PD_1_SIG... | -0.710 | -2.243 | 0.178    | 0.167 |
| REACTOME_APOPTOTI... | -0.562 | -1.937 | 0.205    | 0.193 |
| KEGG_ALPHA_LINOLE... | -0.625 | -1.956 | 0.225    | 0.211 |
